# Supplementary material for: Polyacrylonitrile-based turbostratic graphite-like carbon wrapped silicon nanoparticles: a new-type anode material for lithium ion battery
Source: Royal Society of Chemistry journal article supplement (doi:10.1039/c5ra25380b), 2016-01-01
Supplement: c5ra25380b1.pdf [file c5ra25380b1.pdf]

## Supplementary data

### **Polyacrylonitrile-based turbostratic graphite-like carbon wrapped silicon nanoparticles: a new-type anode material for lithium ion battery**

Xiaozhong Dong,<sup>a,b</sup> Chunxiang Lu,<sup>a,\*</sup> Liyong Wang,<sup>c</sup> Pucha Zhou,<sup>a</sup> Denghua Li,<sup>d</sup> Lu Wang,<sup>a,b</sup>  
Gangping Wu<sup>a</sup> and Yonghong Li<sup>a</sup>

<sup>a</sup>*National Engineering Laboratory for Carbon Fiber Technology, Institute of Coal Chemistry,  
Chinese Academy of Sciences, Taiyuan 030001, China*

<sup>b</sup>*University of Chinese Academy of Sciences, Beijing 100049, China*

<sup>c</sup>*Department of Physics, Hebei Normal University for Nationalities, Chengde 067000, China*

<sup>d</sup>*Shanxi Transportation Research Institute, Taiyuan 030006, China*

### **TEM images**

#### **Supplementary data**

Fig. S1. The TEM image of the structure of Si nanoparticles wrapped in PAN-based turbostratic graphite-like carbon, also the original picture of Fig. 2c.

Fig. S2. The EIS curve of the pure Si.

Fig. S3. The original TEM picture of Fig. 5e.

Fig. S4. The original TEM picture of Fig. 5f.

---

\* Corresponding author: Tel/Fax: +86 351 4166 215.

E-mail address: chunxl@sxicc.ac.cn (Chunxiang Lu).

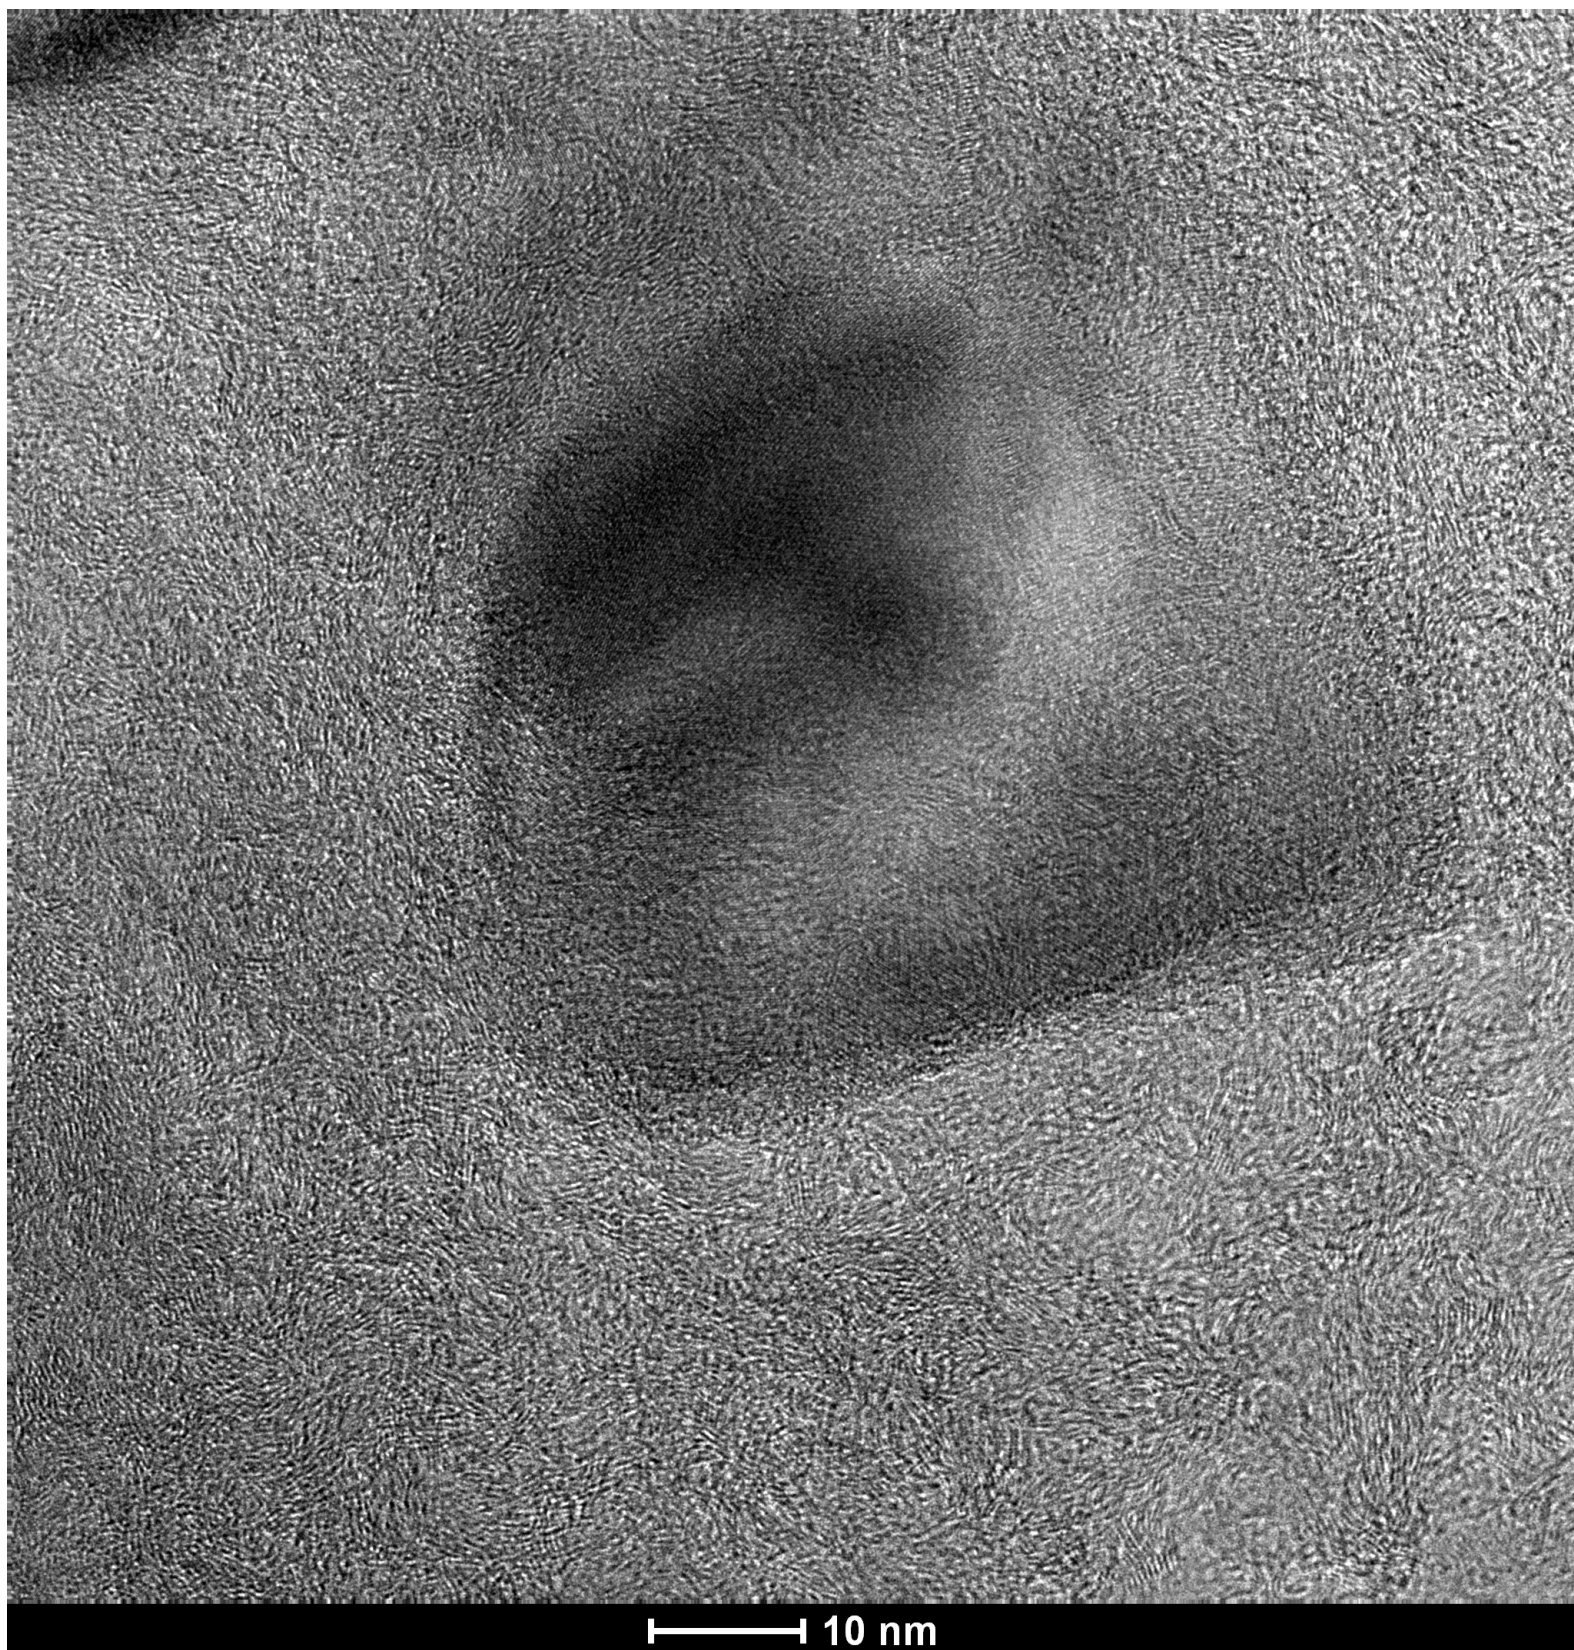

Fig. S1. The TEM image of the structure of Si nanoparticles wrapped in PAN-based turbostratic

graphite-like carbon, also the original picture of Fig. 2c.

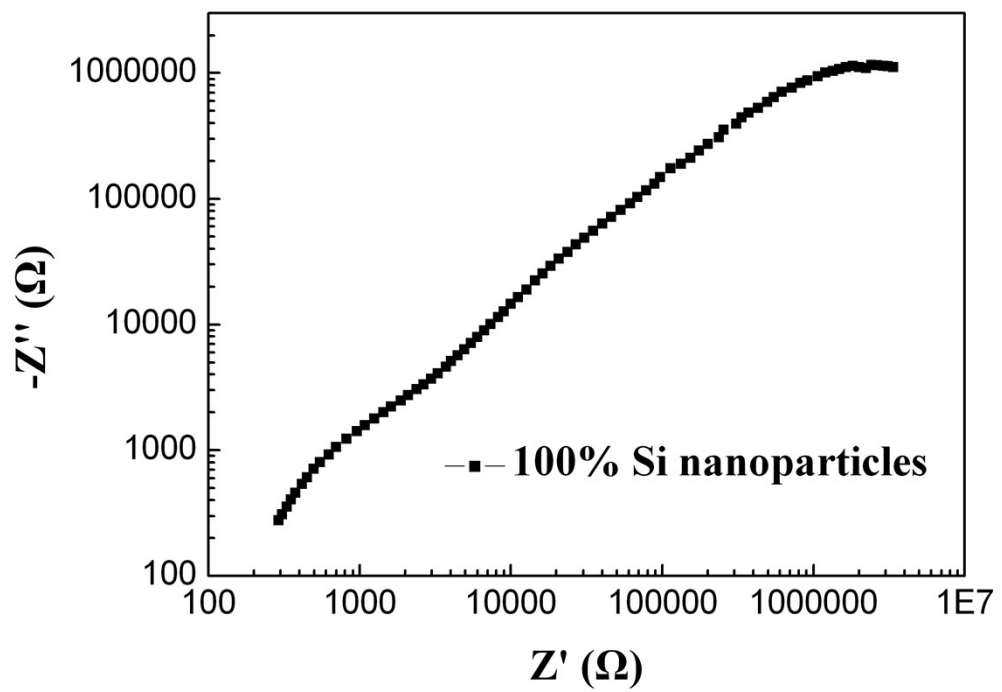

Fig. S2. The EIS curve of the pure Si.

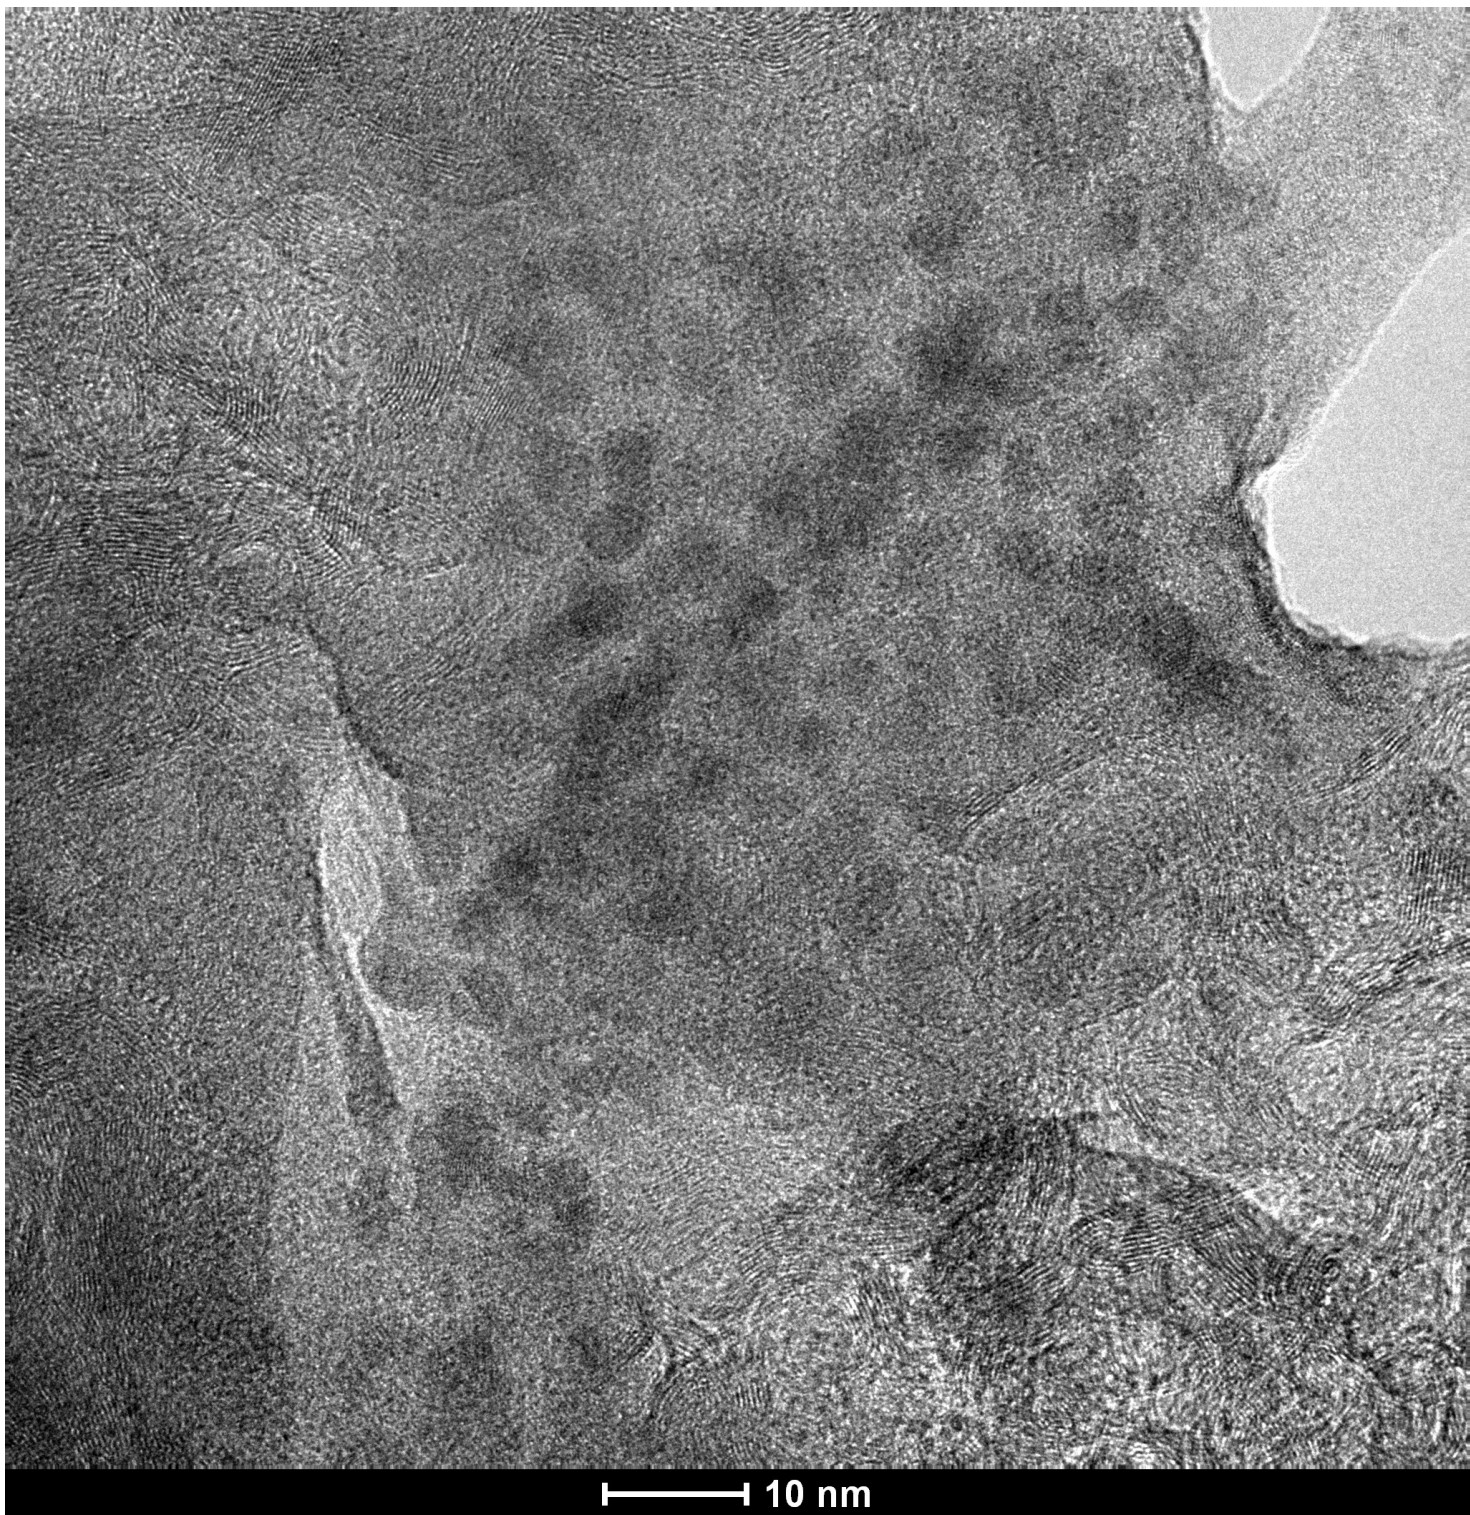

Fig. S3. The original TEM picture of Fig. 5e.

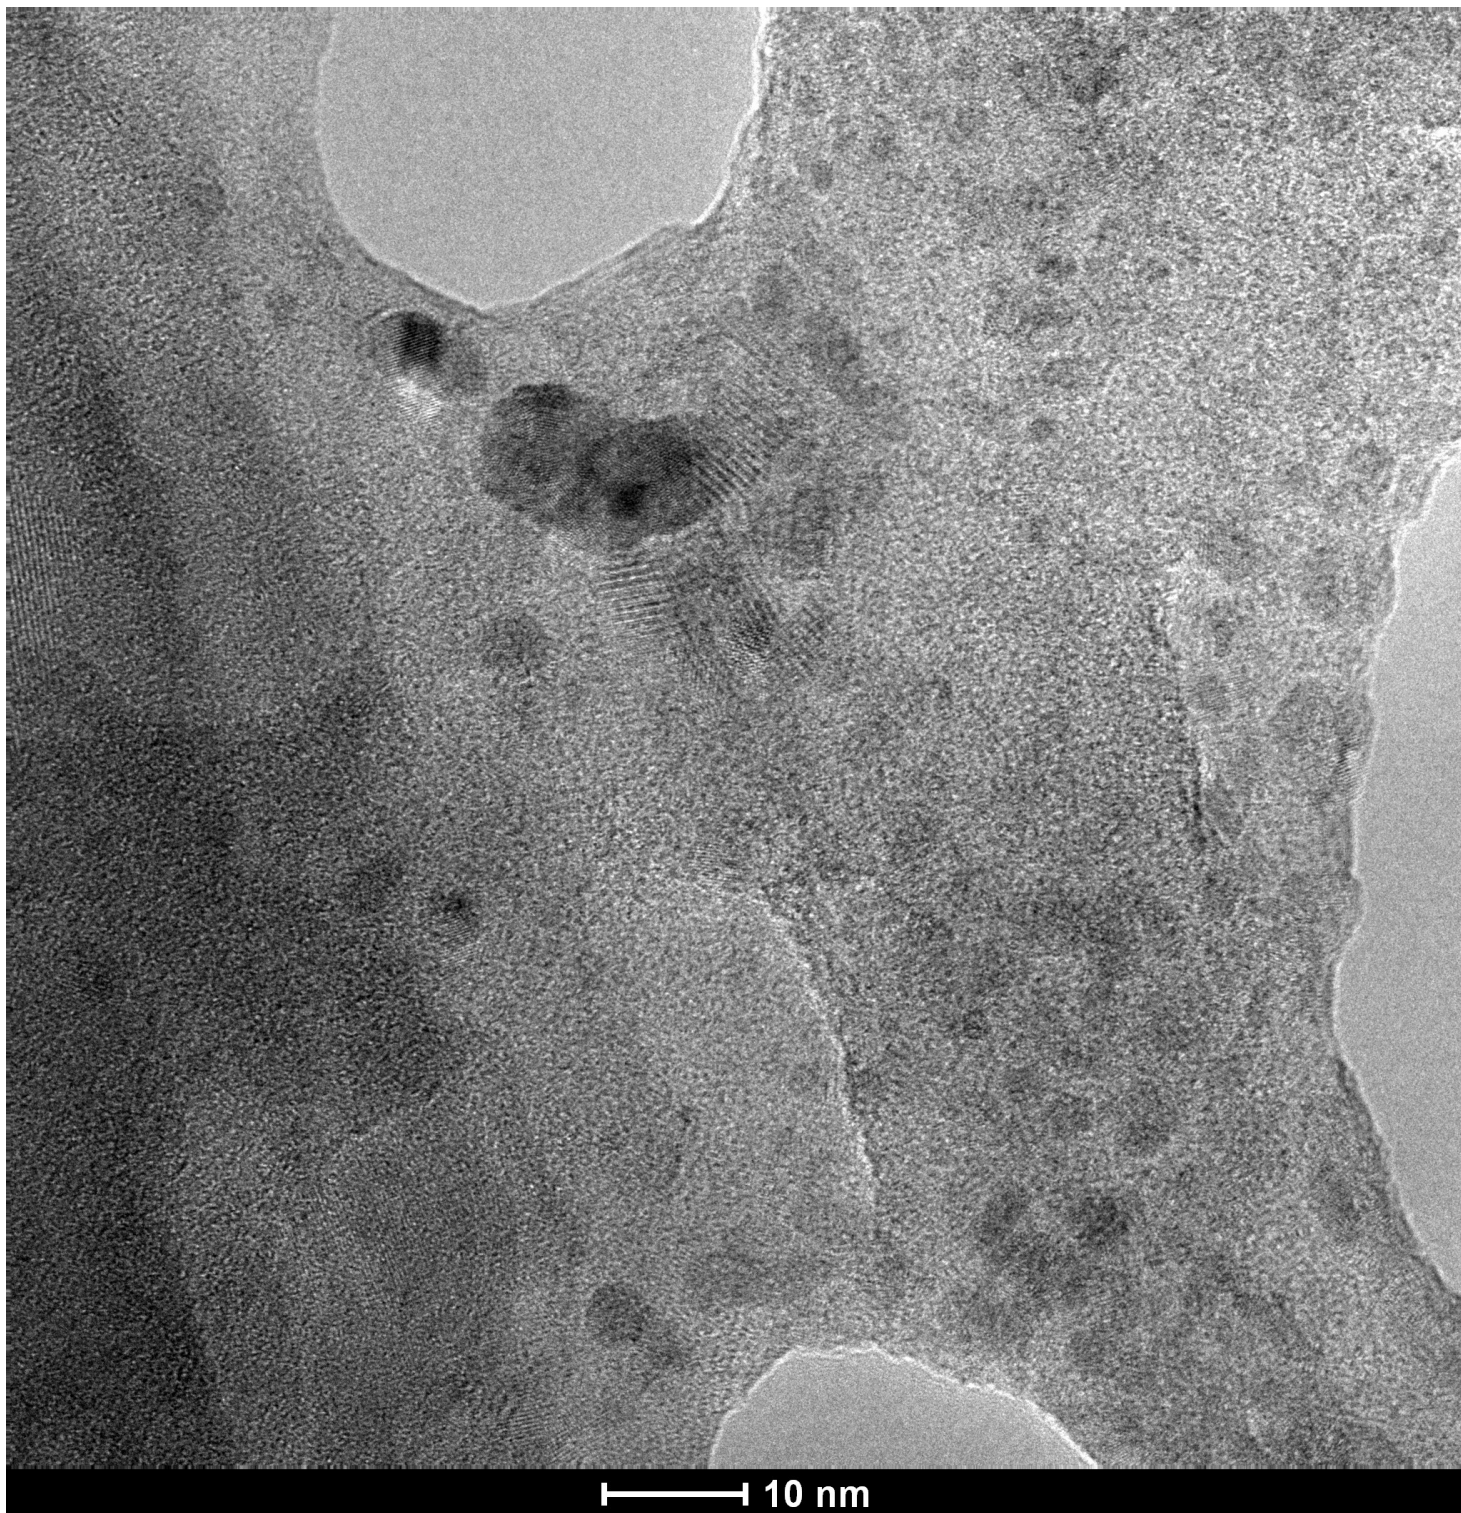

Fig. S4. The original TEM picture of Fig. 5f.
